# Supplementary material for: Three new acylamide ligands formed in situ and their application in constructing metal–organic frameworks
Source: Royal Society of Chemistry journal article supplement (doi:10.1039/c2ce26034d), 2012-01-01
Supplement: c2ce26034d.pdf [file c2ce26034d.pdf]

## Supporting Information

### Three new acylamide ligands formed *in situ* and their application in constructing metal-organic frameworks

Wen-yuan Xu, Xiao-zhao Tian, Xue-feng Feng, Hai-xiao Huang, Gong-ming Sun, Yu-mei Song, and Feng Luo

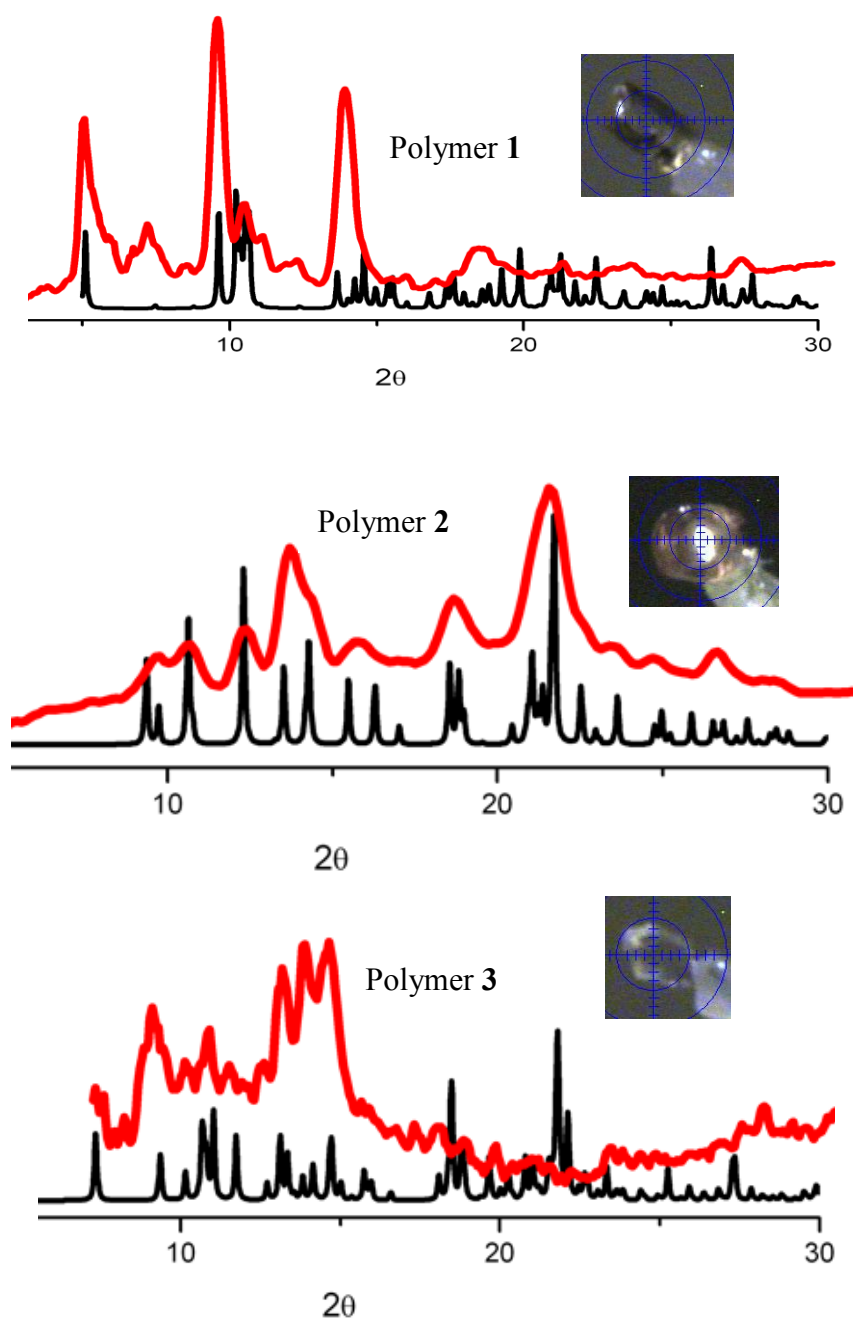

**Figure S1.** The experimental XRD patterns/red and the simulated XRD patterns/black from the single crystal data of 1-3. The inset is the shape of the single crystal of 1-3.
